# Supplementary material for: Do patients have a say? A narrative review of the development of patient-reported outcome measures used in elective procedures for coronary revascularisation
Source: Springer Nature journal article supplement (doi:10.1007/s11136-018-1795-6), 2018-01-29
Supplement: MOESM1 [file 15422428]

**Supplemental file**

**Search strategy used for the updated search for the period January 2010-May 2017.**

| Nr | Search terms | Results |
| --- | --- | --- |
| 1 | heart diseases/ or atrial fibrillation/ or atrial flutter/ or heart failure/ or myocardial ischemia/ or acute coronary syndrome/ or angina pectoris/ or angina, unstable/ or angina, stable/ or coronary disease/ or myocardial infarction/ or peripheral vascular diseases/ or peripheral arterial disease/ or ischemia/ or infarction/ | 546951 |
| 2 | ((heart or cardi*) adj2 (disease* or condition* or disorder*)).tw. | 253017 |
| 3 | ((vascul* or arter* or vessel*) adj2 (disease* or condition* or disorder*)).tw. | 130860 |
| 4 | (coronary adj1 (syndrome* or disease* or disorder* or condition*)).tw. | 32974 |
| 5 | ((heart or cardi*) adj2 fail*).tw. | 124089 |
| 6 | (cardi*myopath* or cardi*-myopath*).tw. | 49773 |
| 7 | angina*.tw. | 46178 |
| 8 | ((myocard* adj2 (infarct* or isch*)) or (heart adj1 attack)).tw. | 177988 |
| 9 | (atria* adj2 (fibril* or flutter*)).tw. | 43553 |
| 10 | 1 or 2 or 3 or 4 or 5 or 6 or 7 or 8 or 9 | 883871 |
| 11 | health surveys/ or health status indicators/ or sickness impact profile/ or questionnaires/ | 396995 |
| 12 | questionnaire*.tw. | 313415 |
| 13 | survey*.tw. | 408991 |
| 14 | ((symptom or outcome) adj1 (measure* or scale* or instrument*)).tw. | 159807 |
| 15 | PROM.tw. | 1425 |
| 16 | 11 or 12 or 13 or 14 or 15 | 935255 |
| 17 | quality of life/ or "activities of daily living"/ or health status/ or "outcome assessment (health care)"/ or psychological tests/ | 306601 |
| 18 | (quality adj2 (life or liv*)).tw. | 159416 |
| 19 | (wellbeing or well-being).tw. | 47411 |
| 20 | (health adj2 (status or attitude* or outcome*)).tw. | 69233 |
| 21 | (activit* adj2 daily).tw. | 31898 |
| 22 | 17 or 18 or 19 or 20 or 21 | 460594 |
| 23 | psychometrics/ | 59599 |
| 24 | (develop* or valid* or evaluat* or reliab*).tw. | 5057547 |
| 25 | 23 or 24 | 5080825 |
| 26 | 10 and 16 and 22 and 25 | 3846 |
| 27 | Animals/ not humans.sh. | 4062702 |
| 28 | (animal* not human*).tw. | 639312 |
| 29 | 26 or 27 | 4190760 |
| 30 | (adolescent/ or child/ or child, preschool/ or infant/) not adult/ | 1444038 |
| 31 | ((child* or adolesc* or infant* or juvenil* or teen* or toddler* or (paediatric* or pediatric*)) not adult*).tw. | 1290215 |
| 32 | 30 or 31 | 1908478 |
| 33 | 26 not 29 | 3835 |
| 34 | 33 not 32 | 3662 |
| 35 | limit 34 to English language | 3331 |

**Data extraction form**

Note that his is a document version of the online form.

Last name of first author _________________________________

Year of publication _________________________________

Title publication _________________________________

Name of instrument _________________________________

Target condition the instrument was developed for (tick all that apply):

- Angina
- MI
- ACS
- CHD
- CAD
- IHD
- PCI
- CABG
- PTCA
- Cardiac patients
- Cardiac rehabilitation
- Other
  - If other, specify: _________________________________

What methods were used to select domains (tick all that apply):

- Literature/existing PROMs
- Patient input
- Expert input
- Statistical analyses
- Unclear
- Not described

What methods were used to select items (tick all that apply):

- Literature/existing PROMs
- Patient input
- Expert input
- Statistical analyses
- Unclear
- Not described

What method was used to obtain patient input (tick all that apply):

- Single focus group >> if ticked, complete section 1
- Multiple focus groups >> if ticked, complete section 1
- Semi-structured interviews (1-on-1) >> if ticked, complete section 2
- Questionnaire: ranking of items >> if ticked, complete section 3
- Questionnaire: other >> if ticked, complete section 3
- Other >> if ticked, complete section 4

Section 1: Follow-up questions for ‘focus groups’

What were patients asked to do? _________________________________

How many patients were involved? _________________________________

What was the diagnosis of the participants:

- - Angina
  - MI
  - ACS
  - CHD
  - CAD
  - IHD
  - PCI
  - CABG
  - PTCA
  - Cardiac patients
  - Cardiac rehabilitation
  - Other non-cardiac diagnoses
  - Healthy participants
  - Not reported
  - Unclear
  - Other

Section 2: Follow-up questions for ‘semi-structured interviews’

What were patients asked to do? _________________________________

How many patients were involved? _________________________________

What was the diagnosis of the participants:

- - Angina
  - MI
  - ACS
  - CHD
  - CAD
  - IHD
  - PCI
  - CABG
  - PTCA
  - Cardiac patients
  - Cardiac rehabilitation
  - Other non-cardiac diagnoses
  - Healthy participants
  - Not reported
  - Unclear
  - Other

Section 3: Follow-up questions for ‘questionnaires’

What were patients asked to do? _________________________________

How many patients were involved? _________________________________

What was the diagnosis of the participants:

- - Angina
  - MI
  - ACS
  - CHD
  - CAD
  - IHD
  - PCI
  - CABG
  - PTCA
  - Cardiac patients
  - Cardiac rehabilitation
  - Other non-cardiac diagnoses
  - Healthy participants
  - Not reported
  - Unclear
  - Other

Section 4: Follow-up questions for ‘other’

What were patients asked to do? _________________________________

How many patients were involved? _________________________________

What was the diagnosis of the participants:

- - Angina
  - MI
  - ACS
  - CHD
  - CAD
  - IHD
  - PCI
  - CABG
  - PTCA
  - Cardiac patients
  - Cardiac rehabilitation
  - Other non-cardiac diagnoses
  - Healthy participants
  - Not reported
  - Unclear
  - Other
